# Supplementary material
Source: publisher site journal article supplement (https://www.spandidos-publications.com/584/downloadSupplementary)

Figure S1. The effect of TM on mRNA expression of ATP7B. HSC3 cells were plated in triplicate and treated with 5  $\mu$ M TM for 24 h. The mRNA of ATP7B was normalized by the amount of  $\beta$ -actin mRNA, expressed relative to the corresponding value for the control. TM, tetrathiomolybdate; ATP7B, ATPase copper transporting beta.

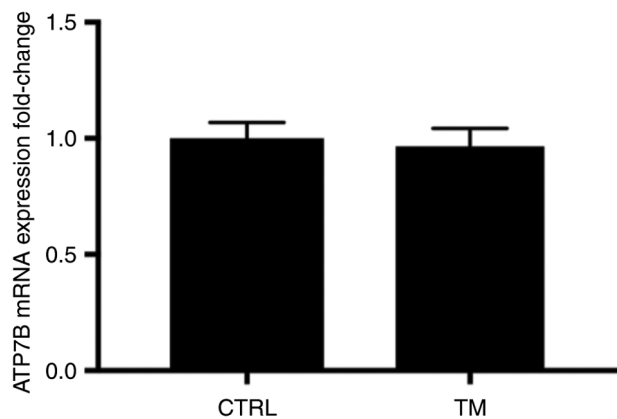

Figure S2. Immunofluorescence analysis of the tumor in the bone marrow in the mouse model of bone invasion. Representative sections of HSC-3 injected mouse tibial bone marrow stained with IL-6. TM, tetrathiomolybdate.

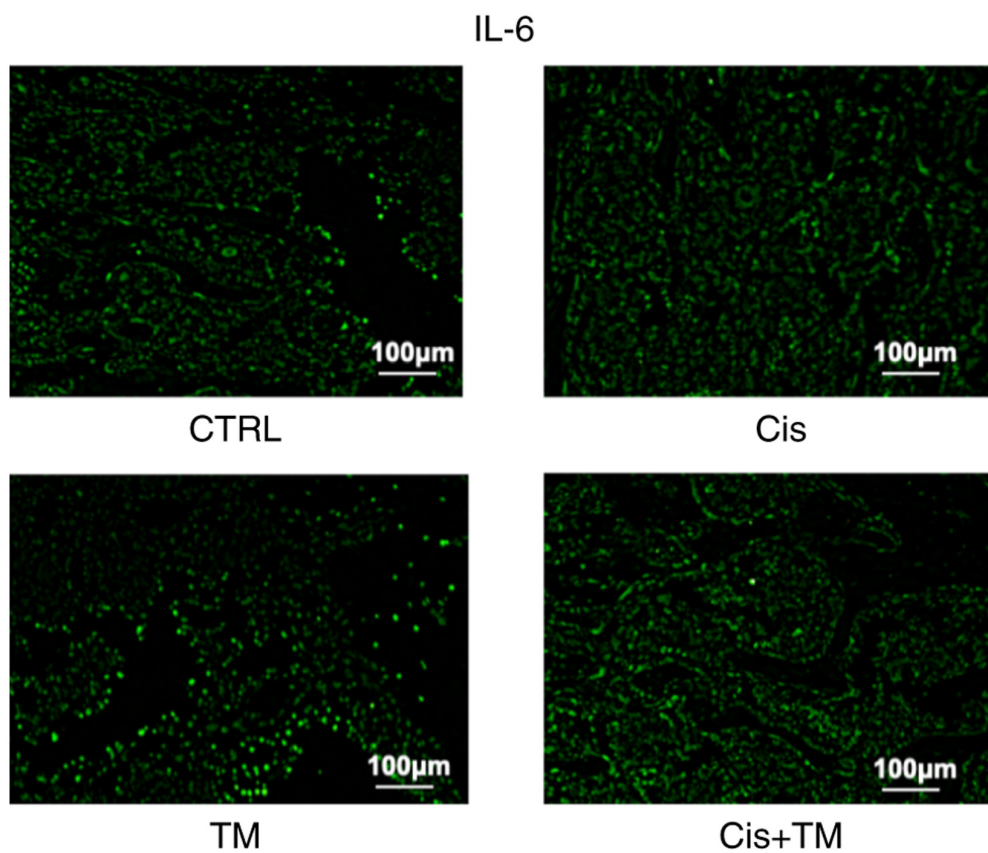

Supplement: Supplementary file 1 [file downloadSupplementary]
